# Supplementary material
Source: bioRxiv or medRxiv preprint supplement (https://www.biorxiv.org/highwire/filestream/34907/field_highwire_adjunct_files/1/105825-2.pdf)
Supplement: Supplementary file [file 105825-2.pdf]

| <b>All isolates</b> |                            |                              |               |            |
|---------------------|----------------------------|------------------------------|---------------|------------|
| <b>Distance (m)</b> | <b><math>F_{ij}</math></b> | <b><math>P</math>- value</b> | <b>95% CI</b> |            |
|                     |                            |                              | <b>Inf</b>    | <b>Sup</b> |
| 97.022              | 0.089                      | 0.000                        | -0.012        | 0.013      |
| 228.996             | 0.027                      | 0.000                        | -0.007        | 0.008      |
| 376.544             | 0.014                      | 0.000                        | -0.007        | 0.007      |
| 526.210             | 0.005                      | 0.099                        | -0.007        | 0.006      |
| 676.894             | -0.003                     | 0.389                        | -0.006        | 0.006      |
| 869.559             | -0.002                     | 0.447                        | -0.005        | 0.005      |
| 1120.821            | -0.004                     | 0.193                        | -0.006        | 0.006      |
| 1372.036            | -0.009                     | 0.009                        | -0.006        | 0.006      |
| 1624.023            | -0.010                     | 0.005                        | -0.007        | 0.007      |
| 1870.971            | -0.025                     | 0.000                        | -0.007        | 0.007      |
| 2234.574            | -0.001                     | 0.927                        | -0.006        | 0.005      |
| 2694.340            | -0.010                     | 0.039                        | -0.010        | 0.010      |

| <b>One isolate per genotype</b> |                            |                              |               |            |
|---------------------------------|----------------------------|------------------------------|---------------|------------|
| <b>Distance (m)</b>             | <b><math>F_{ij}</math></b> | <b><math>P</math>- value</b> | <b>95% CI</b> |            |
|                                 |                            |                              | <b>Inf</b>    | <b>Sup</b> |
| 106.966                         | 0.043                      | 0.000                        | -0.017        | 0.017      |
| 229.889                         | 0.021                      | 0.000                        | -0.009        | 0.009      |
| 377.476                         | 0.011                      | 0.009                        | -0.008        | 0.009      |
| 526.989                         | 0.004                      | 0.223                        | -0.008        | 0.007      |
| 675.617                         | -0.003                     | 0.393                        | -0.007        | 0.007      |
| 870.524                         | -0.003                     | 0.257                        | -0.005        | 0.005      |
| 1120.642                        | -0.001                     | 0.743                        | -0.007        | 0.006      |
| 1372.420                        | -0.002                     | 0.535                        | -0.007        | 0.007      |
| 1623.320                        | -0.009                     | 0.015                        | -0.007        | 0.008      |
| 1870.405                        | -0.015                     | 0.000                        | -0.007        | 0.008      |
| 2225.671                        | 0.002                      | 0.587                        | -0.007        | 0.007      |
| 2695.218                        | -0.006                     | 0.275                        | -0.011        | 0.011      |
